# Supplementary material for: Nature-Based Units as Building Blocks for Resource Recovery Systems in Cities
Source: MDPI journal article supplement (doi:10.3390/w13223153), 2021-11-09
Supplement: s1 [file s1]

Archive with 1 entries (1 files):
- water-1425069-supplementary.pdf
