# Supplementary material for: Nature-Based Units as Building Blocks for Resource Recovery Systems in Cities
Source: MDPI journal article supplement (doi:10.3390/w13223153), 2021-11-09
Supplement: s1 [file s1 › water-1425069-supplementary.pdf]

## Table S1 Supplementary Materials A

### Description of NBS Units

The NBS units described in this paper and their attributed numbers (given in brackets) are extracted from the complete list of NBS units given in the introductory paper that presents a framework for addressing circularity challenges in cities with NBS (Langergraber et al., 2021). However, new NBS units are being described and applied to enable more efficient resource recovery in the cities; therefore, also additional NBS units are addressed in this paper and described below – marked as additional (ADD).

| TREATMENT WETLAND (NBS 21)                                                                                                                                                                                                                                                                                                                                                                                                                                                                                                                                                                                                                                               |  |
|--------------------------------------------------------------------------------------------------------------------------------------------------------------------------------------------------------------------------------------------------------------------------------------------------------------------------------------------------------------------------------------------------------------------------------------------------------------------------------------------------------------------------------------------------------------------------------------------------------------------------------------------------------------------------|--|
| INPUTS                                                                                                                                                                                                                                                                                                                                                                                                                                                                                                                                                                                                                                                                   |  |
| Construction                                                                                                                                                                                                                                                                                                                                                                                                                                                                                                                                                                                                                                                             |  |
| <ul style="list-style-type: none"> <li>• Gravel, sand, expanded clay and/or similar filter material</li> <li>• Organic material (compost or soil) (in some cases, e.g., willow system)</li> <li>• Impermeable liner</li> <li>• Piping systems and pumps (siphons)</li> <li>• Geotextile</li> <li>• Plants (endemic wetland species)</li> </ul>                                                                                                                                                                                                                                                                                                                           |  |
| Type of incoming streams                                                                                                                                                                                                                                                                                                                                                                                                                                                                                                                                                                                                                                                 |  |
| <ul style="list-style-type: none"> <li>• Raw domestic wastewater (Medium values COD 750, BOD<sub>5</sub> 350, TN 60, TP 15, PO<sub>4</sub>-P 10, TSS 400 mg/L)</li> <li>• Primary treated domestic wastewater (primary treated domestic wastewater has 30-40% initial suspended solids and 60-75% initial BOD (Sperling, 2007))</li> <li>• Greywater (COD 200-700, BOD<sub>5</sub> 100-400, TN 8-30, TP 2-7 mg/L)</li> <li>• Secondary treated domestic wastewater (BOD<sub>5</sub> 20-25, COD 100-125, TSS 35, NH<sub>4</sub>-N 10 mg/L)</li> <li>• Tertiary treated domestic wastewater (BOD<sub>5</sub> 20-25, COD 100-125, TSS 35, TP 1-2, TN 10-15 mg/L)</li> </ul> |  |
| Operation                                                                                                                                                                                                                                                                                                                                                                                                                                                                                                                                                                                                                                                                |  |
| <ul style="list-style-type: none"> <li>• Gravity or pumping</li> <li>• Recycling (internal recycling for denitrification enhancing)</li> <li>• Planting</li> </ul>                                                                                                                                                                                                                                                                                                                                                                                                                                                                                                       |  |
| Maintenance                                                                                                                                                                                                                                                                                                                                                                                                                                                                                                                                                                                                                                                              |  |
| <ul style="list-style-type: none"> <li>• Plant biomass harvesting</li> <li>• Checking the pumps and pipes</li> <li>• Replacing pumps (per ca. 5 years)</li> <li>• Replacing media/substrate (once per ca. 10 years), due to clogging and saturated adsorption material</li> </ul>                                                                                                                                                                                                                                                                                                                                                                                        |  |

### Connecting supporting units

- Phosphorus precipitation (SU 3)
- Solid-liquid separation unit (SU 7)

## OUTPUTS

### Type of outgoing streams

- Treated water (quality parameters according to supranational / national legislation + emerging organic contaminants according to the EU watch list and the water directive)
- Evapotranspiration (higher humidity, water loss)
- Biomass production (herbaceous plant, wood biomass)
- Spent substrate/media (after e.g. clogging)

### Co-benefits and limitations

- Reclaimed water for groundwater recharge, green areas and urban garden irrigation
- Biodiversity (insects, birds, snakes, wildlife, plants)
- Carbon sequestration in a case of biomass use as construction/furniture material
- Removal of pathogens
- Bio-energy production
- Aesthetic
- Heat-island mitigation

### Risks

- Mosquitos (not if designed and operated properly)
- Smell (not if designed and operated properly)
- Methane emission (in case of horizontal flow constructed wetland)
- N<sub>2</sub>O emission (in case of horizontal flow constructed wetland)
- Insufficient treatment of nutrients (especially in winter/cold months) for environmental discharge
- Clogging (not if designed and operated properly)

### Connecting NBS nits

- Composting NBS unit (NBS 23)
- Anaerobic treatment (NBS 26)
- Soil improvement and conservation (NBS 33)
- Street trees and urban parks (NBS 39–42)

### Connecting supporting units

- Phosphorus precipitation (SU 3)
- Activated carbon (SU 9)
- Advanced oxidation (SU 10)

## FURTHER READINGS

- Dotro, G., Langergraber, G., Molle, P., Nivala, J., Puigagut, J., Stein, O., Von Sperling, M. *Treatment wetlands*, vol. 7; IWA Publishing: London, United Kingdom, 2017; <https://doi.org/10.2166/9781780408774>
- Kadlec, B. and Wallace, S., *Treatment wetlands*, 2<sup>nd</sup> ed., CRC Press, Boca Raton, Florida, 2009

- Langergraber, G., Dotro, G., Nivala, J., Rizzo, A., Stein, O. *Wetland technology: Practical information on the design and application of treatment wetlands*; Scientific technical report No. 27; IWA Publishing: London, United Kingdom, 2020; <https://doi.org/10.2166/9781789060171>
- Von Sperling; *Wastewater characteristics, treatment and disposal*, vol. 1; IWA Publishing: London, United Kingdom, 2007; <https://doi.org/10.2166/9781780402086>
- Henze, M. and Comeau, Y., *Wastewater Characterization*. In: *Biological Wastewater treatment: Principles and Design*; Henze, M., van Loosdrecht, M.C.M., Ekama, G.A., Brdjanović, D., Eds.; IWA Publishing: London, United Kingdom, 2008, pp. 33-52.
- Urban Wastewater Directive 91/271/EEC

## COMPOSTING

(NBS

23)

### INPUTS

#### Construction

- Wooden or plastic or concrete boxes for home-composting
- Impermeable liner and leachate collection pipes
- Air and/or water supply devices
- If central composting – impermeable ground, warehouse, large composting tunnels

#### Type of incoming streams

- Food waste (kitchen waste, market waste....)
- Solid digestate
- Organic fraction of the municipal solid waste
- Green waste (to be used bulking agent)
- Faecal sludge
- Side streams: air, water
- Worms (for vermicomposting)
- Dry matter >40%

#### Operation

- Mixing (manual or mechanical)
- Ventilation (passive or active, for vermicomposting relies on worms to mix, aerate and fragment)
- Adding bulking materials (to reach optimal texture and optimal oxygenation)
- Adding water (to achieve humidity level in the range of 40-60%)
- Temperature and humidity monitoring (for vermicomposting: temperature should be closely controlled)
- Monitoring of compost regarding maturity, gases (VOCs, ammonia, methane, carbon dioxide, N<sub>2</sub>O, NO) and appropriate C/N ratio (25–30)
- pH to be kept between 5–9 (more stringent for vermicomposting)

- Light should be controlled for vermicomposting
- Monitoring of end product (for central composting unit)

### **Maintenance**

Only for central composting unit

- Biofilters and air ventilation systems maintenance in central composting unit
- Water spaying systems
- Maintenance of monitoring devices (humidity, temperature and oxygen)
- Maintenance of mechanical mixing devices

### **Connecting NBS units**

- Solid waste anaerobic treatment (NBS 26)
- Treatment wetlands (NBS 21)
- Street trees and urban parks (NBS 39–41)

### **Connecting supporting units**

- Solid/liquid separation unit (SU 7)
- Mechanical pre-treatment (shredding and mixing) (ADD)

## **OUTPUTS**

### **Type of outgoing streams**

- Compost (C / N: 50-90% (organic) / P / K) / Vermi-compost
- Polluted air (ammonia and VOCs) to be treated
- Leachate (COD, N) to be treated
- Water vapor
- Worms

### **Co-benefits and limitations**

- Waste heat (extra energy) only for composting
- Pathogens removal only for composting
- Feed production

### **Risks**

- Leachate infiltration and/or runoff
- Smell
- Poor hygienisation (too short or not homogenized thermophilic conditions)
- Methane, ammonia, NO and N<sub>2</sub>O emissions
- Too dry or too moist compost
- Energy needed due to bad design or climate conditions
- Presence of microplastic (depending on incoming material quality)
- Presence of emerging organic contaminants
- Accumulation of metals at toxic levels

### **Connecting NBS units**

- Street trees/ urban parks (NBS 39–42)
- Productive gardens, urban farms and orchards (NBS 49, 51)
- Soil improvement and conservation (NBS 33)
- Green roofs and walls (NBS 13–20)
- Aquaculture (worms) (NBS 44)

### Connecting supporting units

- Air treatment
- Leachate treatment
- Disinfection unit (SU 5)
- Heat exchanger
- Mechanical processing (i.e. compost sieving)

### FURTHER READINGS

- Harder, R.; Wielemaker, R.; Larsen, T.A.; Zeeman, G.; Öberg, G. Recycling nutrients contained in human excreta to agriculture: Pathways, processes, and products. *Critical Reviews in Environmental Science and Technology* **2019**, 49(8), 695-743. <https://doi.org/10.1080/10643389.2018.1558889>
- Ghorbani, M.; Sabour, M.R. Global trends and characteristics of vermicompost research over the past 24 years. *Environ. Sci. Pollut. Res.* **2021**, 28, 94-102. <https://doi.org/10.1007/s11356-020-11119-x>
- Grasserová, A.; Hanč, A.; Innemanová, P.; Cajthaml, T. Composting and vermicomposting used to break down and remove pollutants from organic waste: a mini review. *Eur. J. Environ. Sci.* **2020**, 10(1), 9-14. <https://doi.org/10.14712/23361964.2020.2>
- Van der Wurff, A.W.G.; Fuchs, J.G.; Raviv, M.; Termorshuizen, A.J. *Handbook for Composting and Compost Use in Organic Horticulture*, BioGreenhouse COST Action FA 1105, 2016, [www.biogreenhouse.org](http://www.biogreenhouse.org). ISBN: 978-94-6257-749-7, <http://dx.doi.org/10.18174/375218>

## SOIL CONSERVATION AND (NBS 24, PHYTOMANAGEMENT 25, 33)

### INPUTS

#### Construction

- Growing substrate (contaminated soils including technosols and mining contaminated soils or naturally metal rich soils including ultramafic soils)
- Plants for phytoextraction (including hyperaccumulating plants)
- Components (e.g. mulch, woodchips, compost, biochar) to enhance soil structure (texture)/organic matter/water holding capacity and plant support
- Irrigation system (temporary irrigation could be needed unless rainfall is adequate until plants grow or in dry season)
- Manage excess water and nutrients e.g., through design of drainage system

#### Type of incoming streams

- Irrigation water (surface or groundwater, reclaimed water)
- Appropriate plant species and stage of growth
- Appropriate characteristics for mulch, woodchip, biochar and compost (e.g., pH, CEC, organic matter, porosity)
- Organic and mineral fertilizers for biostimulation purposes

- Addition microbial strains for bioaugmentation purposes

### **Operation**

- Soil preparation (tilling type, fertilizer supply)
- Sowing/seedling, mowing (for leguminous species to enhance nitrogen fixation)
- Planting (for phytoremediation) while taking care of plant density and stage of growth
- Harvesting
- Temporary irrigation could be needed unless rainfall is adequate until plants grow or in dry season
- Pest management (e.g. herbicides)
- Gas emission monitoring (e.g. VOCs)

### **Maintenance**

- Checking soil quality
- Regular maintenance of vegetation (remove litter, harvesting, replanting)
- During dry season and at the initial plant growth stage, irrigation required to maintain plants
- Supply of organic and inorganic fertilizers

### **Connecting NBS units**

- Composting (NBS 23)
- Solid waste anaerobic treatment (NBS 26)
- Treatment wetland (NBS 21)

### **Connecting supporting units**

- Biochar production (SU 6)
- Mulch and wood chips production

## **OUTPUTS**

### **Type of outgoing streams**

- Soil improvement (reclaimed soils; improvements of soil physical, chemical and biological characteristics)
- Material recovery and reuse: biomass from contaminated plants (used for bioenergy generation, biochar or composting- supply of soil conditioner, processing to bio-based materials)
- (Hyper)-accumulator plants (Metals bio-ores)
- Nutrient recovery and reuse
- Water vapor via evapotranspiration (higher humidity, water loss)
- Food and feed (use of leguminous and cereal species, edible halophytes for salinized soil, edible yield from food crops used for purposes of soil stabilization, improvement of soil nutrient/water retention/metabolization capabilities)

### **Co-benefits and limitations**

#### **Ecosystem services enhancement**

- Water quality improvement / Groundwater quality preservation
- Stormwater management, water infiltration and retention enhancement, flooding reduction
- Habitat improvement – biodiversity increase or preservation (e.g. increase of beneficial soil organisms)

- Carbon sequestration / N fixation (less N requirement in soil, less fertilizers, less emissions)
- Improved nutrient metabolization, retention and plant uptake (reduction of synthetic fertilizer needed in agriculture)
- Soil organic/inorganic contaminants immobilization and/or removal
- Aesthetic
- Erosion prevention
- Climate regulation/cooling
- Soil compaction prevention

#### Risks

- Insufficient removal rate and yield of soil pollutants (especially in winter/cold months when plants are quiescent)
- Contaminants transfer in the food chain
- Microplastic or other pollutant inputs (e.g. PAHs, potentially toxic elements) from incoming streams
- Overfertilization
- Inappropriate plant species/growth stage selection

#### Connecting NBS units

- Composting (NBS 23)
- Solid waste anaerobic treatment (NBS 26)

#### Connecting supporting units

- Biochar production (SU 6)
- Mulch and wood chips production

#### FURTHER READINGS

- Liu, S., Yang, B., Liang, Y., Xiao, Y., & Fang, J. (2020). Prospect of phytoremediation combined with other approaches for remediation of heavy metal-polluted soils. *Environmental Science and Pollution Research*, 27(14), 16069-16085. <https://doi.org/10.1007/s11356-020-08282-6>
- Shikha, D., & Singh, P. K. (2021). In situ phytoremediation of heavy metal-contaminated soil and groundwater: a green inventive approach. *Environmental Science and Pollution Research*, 28(4), 4104-4124. <https://doi.org/10.1007/s11356-020-11600-7>
- Moreira H, Pereira SIA, Mench M, Garbisa C, Kidd P and Castro PML (2021) Phytomanagement of Metal(loid)-Contaminated Soils: Options, Efficiency and Value. *Front. Environ. Sci.* 9:661423. <https://doi.org/10.3389/fenvs.2021.661423>

## BLACK SOLDIER FLY / INSECT FARMING

(ADD)

### INPUTS

#### Construction

- Boxes, bins or containers for growth of adult flies (hatchery/nursery)
- Boxes, bins, or container for growth of larvae and treatment on biowaste
- Reactor for refinement of larvae

### Type of incoming streams

- Organic waste: animal manure, human excreta, fruit, biowaste, vegetable waste, organic fraction of municipal solid wastes, millings and brewery side streams
- Insects: *Hermetia illucens* L. (Diptera: *Stratiomyidae*) larvae age typically 4–9 days (1–2 mg)

### Operation

- Input organic materials moisture should be adjusted to 70-80%
- 100–125 mg feed/larva/day (based on 60% moisture content). All at once or periodic feeding
- Development time: 15–52 days
- Separation of Black Soldier Fly (BSF) larvae (BSFL) from process residues
  - Sieving (70–299 mg, 6–20 mm)
  - Ramp where larvae can climb before prepupae stage to facilitate separation
- Refinement of larvae: killing, cleaning, sterilisation, drying and fractionation (proteins, lipids and chitin)
- Process influenced by: pH, container dimensions, temperature, larval density, humidity, feeding rate, feeding intervals.

### Maintenance

- Maintenance of larvae refinement reactor

### Connecting NBS units

- Not applied

### Connecting supporting units

- Pre-treatment of the biowaste (e.g. particle size reduction, dewatering, removal of inorganics)

## OUTPUTS

### Type of outgoing streams

- Gaseous emissions (66% of C to CO<sub>2</sub>), 50% of N to NH<sub>3</sub>
- Larval biomass (32–58% proteins, 15-39% lipids based on DW / (12% of C, 10% of N and less than 3.5% of P))
- Compost like residue (similar to immature compost)

### Co-benefits and limitations

- Pathogens numbers in the feed are reduced
- Pharmaceuticals and pesticides are not taken up by larvae
- Pharmaceutical and pesticides are reduced in biowaste after treatment with soldier fly

### Risks

- Challenges: operation reliability and efficiency need to be improved, low TRL/economy of scale; missing benchmark for products, incomplete or restrictive regulations
- Lack of standard operating procedures: feeding rate and interval, biowaste description, genetics, larval density, temperature and time of harvest
- Potentially toxic metals are taken up by BSFL and may exceed animal feed regulations
- Fate of parasites and viruses unclear
- Smell

### Connecting NBS units

- Composting (NBS 23)

- Solid waste anaerobic treatment (NBS 26)
- Aquaponics (NBS 47)

#### Connecting supporting units

- Mechanical processing (i.e. compost sieving)
- Post-treatment of the larvae (e.g. drying, protein and lipid extraction)

#### FURTHER READINGS

- Lalander, C., Senecal, J., Gros Calvo, M., Ahrens, L., Josefsson, S., Wiberg, K. & Vinnerås, B. (2016). Fate of pharmaceuticals and pesticides in fly larvae composting, *Science of The Total Environment*, 565, 279-286. <https://doi.org/10.1016/j.scitotenv.2016.04.147>
- Harder, R., Wielemaker, R., Larsen, T.A., Zeeman, G. & Öberg, G. (2019). Recycling nutrients contained in human excreta to agriculture: Pathways, processes, and products. *Critical Reviews in Environmental Science and Technology*, 49:8, 695-743. <https://doi.org/10.1080/10643389.2018.1558889>
- Gold, M., Tomberlin, J.K., Diener, S., Zurbrugg, C., & Mathys, A. (2018). Decomposition of biowaste macronutrients, microbes, and chemicals in black soldier fly larval treatment: A review. *Waste Management*, 82, 302-318 <https://doi.org/10.1016/j.wasman.2018.10.022>
- da Silva, G.D.P. & Hesselberg, T. (2020). A review of the use of Black Soldier Fly larvae, *Hermetia illucens* (Diptera: Stratiomyidae), to compost organic waste in tropical regions. *Neotrop Entomol* **49**, 151–162. <https://doi.org/10.1007/s13744-019-00719-z>
- McConville, J., Niwagaba, C., Nordin, A., Ahlström, M., Namboozo, V. & Kiffe, M. (2020). Guide to Sanitation Resource Recovery Products & Technologies A supplement to the Compendium of Sanitation Systems and Technologies. Report 116, Dept. of Energy and Technology, SLU, ISBN 978-91-576-9801-8. [https://pub.epsilon.slu.se/21284/1/mcconville\\_j\\_et\\_al\\_210119.pdf](https://pub.epsilon.slu.se/21284/1/mcconville_j_et_al_210119.pdf)

## STREET TREES / ROAD VEGETATION

(NBS

39)

### INPUTS

#### Construction

- Pits or concrete/modular/built box to limit the growth of roots towards infrastructure
- Soil + compost + Biochar (appropriate growth media)
- Drainage layer at the bottom
- Tree seedlings of proper age (non-allergenic)
- Irrigation system (not necessary but recommended)
- Sufficient area for surface infiltration in case of no irrigation
- Manpower for digging the pit, transporting the substrate and trees (city trees are planted at a height of > 5 m)

#### Type of incoming streams

- Manpower (for breeding, raising and planting)
- The trees themselves need to be transported to the city, usually from outside

- Compost/fertilizer/biochar at planting and for maintenance (depending on soil type and tree species)
- Irrigation water (reclaimed water / surface-groundwater)

#### **Operation**

- Irrigation
- Fertilization
- Street cleaning (fall-off leaves, flowers, fruit, seeds etc.)

#### **Maintenance**

- Tree care (e.g., pruning, cutting branches, shaping when needed)
- Cutting at the end of a lifetime

#### **Connecting NBS units**

- Composting (NBS 23)
- Solid digestate from AD systems
- Harvested algae from photobioreactors (NBS 48)
- Treated water from treatment wetlands (NBS 21)
- Retained water from wet and dry retention ponds (NBS 5, 6)

#### **Connecting supporting units**

- Phosphate precipitation (SU 3)
- Ammonia stripping (SU 4)
- Membrane unit filtration (SU 8)
- Biochar (SU 6)
- Advanced oxidation (SU 10)
- Disinfection (SU 5)

### **OUTPUTS**

#### **Type of outgoing streams**

- Wood biomass (aboveground wood biomass is not expected to accumulate pollutants\*)
- Leaf biomass (may contain pollutants such as dust particles, heavy metals, PAHs)
- Evapotranspiration
- Fruit and seed biomass (may contain pollutants – effects on further use)

#### **Co-benefits and limitations**

Ecosystem services:

- Microclimate/temperature regulation (cooling, shade)
- Carbon sequestration
- Wind and noise mitigation
- Air purification (PAHs, micro-dust, heavy metals)
- Rainwater treatment and uptake (reduction of surface runoff)
- Reduction of water and wind erosion of soil
- Soil improvement and treatment
- Improved biodiversity (birds, insects)
- Creation of green corridors, e.g., as steppingstones for animal and plant species
- Glare reduction
- Support for pollinators

- Genetic resources
- Enhanced biodiversity in city caused by planting non-native street trees
- Social and cultural benefits
- Psychological, aesthetic or recreational benefits
- Groundwater recharge
- Educational services
- Economic benefits that result from above ecosystem services, e.g. property values

#### Risks

- Allergic potential of trees: tree pollen (e.g. from *Fraxinus*, *Platanus*, *Betula*, *Salix*...)
- Poisonous trees (rare, e.g., *Aesculus hippocastaneum*, *Taxus* sp.)
- Emissions of biogenic volatile organic compounds (BVOC), e.g., terpenes and isoprene that promote ozone formation
- Trees damage people or infrastructure: e.g., broken branches during storms, slippery sidewalks, pushing up street surface with roots

#### Connecting NBS units

- Composting (NBS 23)
- Anaerobic treatment (NBS 26)

#### Connecting supporting units

- Production of wood chips
- Biochar (SU 6)

#### FURTHER READINGS

- Von Döhren, P. & Haase, D. (2019), Risk assessment concerning urban ecosystem disservices: The example of street trees in Berlin, Germany, *Ecosystem Services*, 40, 101031, <https://doi.org/10.1016/j.ecoser.2019.101031>
- Moro, P.A., Assisi, F., Cassetti, F., Bissoli, M., Borghini, R., Davanzo, F., Della Puppa, T., Dimasi, V., Ferruzzi, M., Giarratana, T. & Travaglia, A. (2009), Toxicological hazards of natural environments: Clinical reports from Poison Control Centre of Milan. *Urban Forestry & Urban Greening*, 8, 179–186, <https://doi.org/10.1016/j.ufug.2009.02.007>
- Czaja, M., Kołton, A. & Muras, P. (2020). The complex issue of urban trees-stress factor accumulation and ecological service possibilities. *Forests*, 11, 9, 932; <https://doi.org/10.3390/f11090932>
- Säumel, I., Weber, F. & Kowarik, I. (2016). Toward livable and healthy urban streets: Roadside vegetation provides ecosystem services where people live and move, *Environmental Science & Policy*, 62, 24-33, <https://doi.org/10.1016/j.envsci.2015.11.012>
- Silvera Seamans, G. (2013). Mainstreaming the environmental benefits of street trees. *Urban Forestry & Urban Greening*, 12, 1, 2-11. <https://doi.org/10.1016/j.ufug.2012.08.004>
- See also references recommended for large urban parks and pocket gardens

## LARGE URBAN PARKS AND POCKET GARDENS

(NBS 40,

41)

## INPUTS

### Construction

- Landscaping
- Construction of walking paths, cycling lanes, banks, recreational facilities (open air fitness, playground facilities for kids, educational/informational equipment – boards, pavilions, green living rooms, open stages)
- Fences when needed
- Dog park (fenced)
- Additional soil + compost (appropriate growth media)
- Tree, shrub, flowers, herbs seedlings of proper age (non-allergenic)
- Irrigation system (not necessary but recommended)
- Optional ornamental artificial pond: excavation, impermeable layers, planting boxes for aquatic plants, seedling, water source, fish, turtles, frogs
- Optional greenhouses (tropical, overwintering, butterfly)
- Revitalized small streams located the park (landscaping, see NBS units for river restoration)
- NBS units for rainwater management can be integrated in the park
- Houses for insects and beehives, birdhouses
- Waste bins as part of city infrastructure
- Toilets as part of city infrastructure or remote facilities

### Type of incoming streams

- Compost/fertilizer at planting and for maintenance (depending on soil type and tree species)
- Irrigation water (reclaimed water, greywater, rainwater)
- Lawn fertilizers

### Operation

- Footpath's cleaning (fall off leaves, flowers, seeds etc.)
- Protection measures for sensitive species/ecosystems and protected species
- Bee keeping
- Insect keeping
- Harvesting
- Biomass/organic material processing (e.g. composting)
- Irrigation/fertigation

### Maintenance

- Fertilization
- Horticulture activities: cutting branches, shaping when needed, mowing of grass and ornamental plants
- Maintenance of park infrastructure (recreational and educational facilities, banks, pathways...)
- Monitoring of water quality and biodiversity
- Urban forest management (in case forests are a part of park, see NBS urban forest)

### Connecting NBS units

- Composting (NBS 23)

- Solid digestate from anaerobic treatment (NBS 26)
- Harvested algae from photobioreactors (NBS 48)
- Treated water from treatment wetlands (NBS 21)
- Retained water from wet and dry retention ponds (NBS 5, NBS 6)

#### Connecting supporting units

- Phosphate precipitation (SU 3)
- Ammonia stripping (SU 4)
- Membrane filtration (SU 8)
- Biochar (SU 6)
- Advanced oxidation (SU 10)
- Disinfection (SU 5)

### OUTPUTS

#### Type of outgoing streams

- Wood and plant biomass
- Mowed grass
- Leaf biomass
- Trees' fall-off (non-edible fruits, seeds)
- Dog feces in plastic bags
- Compost from in case of composting on site

Specific to large urban parks:

- Fish biomass
- Garbage waste

Specific to pocket gardens:

- Fruits (edible)

#### Co-benefits and limitations

- Microclimate regulation
- Wind and noise mitigation
- Reduction of water and wind erosion of soil
- Aesthetics
- Air purification (PAHs, micro-dust, heavy metals)
- Increase of biodiversity (birds, insects, bees, wildlife)
- Pollination
- Soil improvement and treatment
- Glare reduction
- Economic benefits that result from above ecosystem services
- Social benefits (recreation, gardening, relaxation, socialisation, education, fishing, culture...)
- Compost production

Specific to large urban parks:

- Rainwater management
- Food source (fruit trees, berries, mushrooms, herbs, edible plants, fish)

Specific to pocket gardens:

- Mitigate stormwater runoff events (parks)
- Green corridor effect
- Food source (fruit trees)

#### Risks

- Allergic potential of trees: tree pollen (e.g. from *Fraxinus* sp., *Platanus* sp., *Betula* sp., *Salix* sp. Etc.)
- Poisonous trees (rare, e.g., *Aesculus hippocastaneum*, *Taxus* sp.)
- Emissions of biogenic volatile organic compounds (BVOC), e.g., terpenes and isoprene that promote ozone formation
- Trees damage people or infrastructure: e.g., broken branches during storms, slippery sidewalks, pushing up street surface with roots

#### Connecting NBS units

- Composting (NBS 23)
- Anaerobic treatment (NBS 26)

#### Connecting supporting units

- Production of wood chips
- Biochar (SU 6)

#### FURTHER READINGS

- Schlaepfer, M.A., Guinaudeau, B.P., Martin, P. & Wyler, N. (2020), Quantifying the contributions of native and non-native trees to a city's biodiversity and ecosystem services, *Urban Forestry & Urban Greening*, 56, 26861, <https://doi.org/10.1016/j.ufug.2020.126861>
- Guo, Z., Zhang, Z., Wu, X., Wang, J., Zhang, P., Ma, D., & Liu, Y. (2020) Building shading affects the ecosystem service of urban green spaces: Carbon capture in street canyons. *Ecological Modelling*, 431, 109178, <https://doi.org/10.1016/j.ecolmodel.2020.109178>
- See also references recommended for street trees and road vegetation

## PHOTOBIOREACTORS (open raceway ponds or closed (NBS panel systems) 48)

### INPUTS

#### Construction

Open raceway ponds:

- Light source (sunlight + artificial source)
- Shallow pond (excavation)
- Mixing unit (e.g. paddle wheel or pump)
- CO<sub>2</sub> blowers
- Greenhouse (optional)

Closed panel system:

- Light source (mostly artificial source)
- Photobioreactor glass tubes, bags or similar for vertical or horizontal setting
- Mixing unit (pump, see waves when installed on sea surface as floating system)
- CO<sub>2</sub> injector

- Greenhouse (optional)
- Storage tank for fertilizers and system for application in case of algae cultivation on tap water or rainwater

#### **Type of incoming streams**

- Inoculum of algal communities
- Nutrients (e.g. primary or secondary treated wastewater, black water, source separated urine, digestate from biogas plant, wastewater from food production industry)
- Carbon dioxide (e.g. with aeration, from industrial sources or combusted CH<sub>4</sub> gas)
- Light (natural or artificial)

#### **Operation**

- Mixing or waving
- CO<sub>2</sub> injection
- Temperature and pH control
- Supply of inoculum culture
- Algae biomass harvesting (flocculation, settler)-supporting unit

#### **Maintenance**

- Monitoring for treated water quality
- Removal of settled biomass
- Monitoring of algae culture or algae-bacteria culture
- Monitoring of pH, CO<sub>2</sub> ratio

#### **Connecting NBS units**

- Anaerobic treatment (NBS 26) for liquid digestate supply
- Aerobic water treatment (NBS 27)

#### **Connecting supporting units**

- Reservoir for inoculum cultivation and storage

### **OUTPUTS**

#### **Type of outgoing streams**

- Treated water (treated blackwater or urine, treated municipal WW, treated digestate from biogas plant)
- Algal biomass, (e.g. for direct use as organic fertiliser, indirect as biofuel, biostimulants, cosmetic/pharmaceutical industries; biostimulants for agriculture, animal feed)

#### **Co-benefits and limitations**

- Removal of nutrients (N, P) from wastewater
- Potential to have high-value compounds in the biomass (e.g. biostimulants, pigments)
- Potential removal of CO<sub>2</sub> from e.g. industrial gas streams (only in well-designed systems)
- Polishing of treated wastewater e.g. MPs, pathogens, micro-pollutants (under research)

#### **Risks**

- Culture contamination by fungi, zooplankton, viruses
- Inappropriate pH, CO<sub>2</sub> control
- Inefficient CO<sub>2</sub> injection (bubble size, pressure)
- inefficient algal biomass harvesting
- Seasonal algae die-off, winter operation (operation costs increase)

- Self-shading, weak biomass control
- Open system sensitive weather conditions
- Glass/plastic waste in case of closed system

#### Connecting NBS units

- Anaerobic digestion (NBS 26)

#### Connecting supporting units

- Solid/liquid separation systems (settler, membrane, flotation, flocculation, centrifugation, micro-screening) (SU 7)
- Advanced oxidation (SU 10) treatment for reclaimed water production
- OP/UV disinfection (SU 5) for reclaimed water production
- Membrane filtration (SU 8) for reclaimed water production

#### FURTHER READINGS

- Tuantet, K., Temmink, H., Zeeman, G., Janssen, M., Wijffels, R.H. & Buisman, C.J.N. (2014). Nutrient removal and microalgal biomass production on urine in a short light-path Photobioreactor. *Water Research*, 55,162-174. <https://doi.org/10.1016/j.watres.2014.02.027>
- Vasconcelos Fernandes, T., Shrestha, R., Sui, Y., Papini, G., Zeeman, G., Vet, L.E.M., Wijffels, R.H. & Lamers, P. (2015). Closing Domestic Nutrient Cycles Using Microalgae. *Environ. Sci. Technol.*, 49, 12450–12456. <https://doi.org/10.1021/acs.est.5b02858>
- Muñoz, R., Temmink, H., Verschoor, A.M., van der Steen, P. (2019). *Algal Technologies for Wastewater Treatment and Resource Recovery*, IWA Publishing, <https://doi.org/10.2166/9781789060935>

## ANAEROBIC TREATMENT FOR CH<sub>4</sub> AND VFA (ADD) PRODUCTION

| Systems with biomass retention | Systems without biomass retention |
|--------------------------------|-----------------------------------|
|--------------------------------|-----------------------------------|

#### INPUTS

##### Construction

- |                                                                                                                                                                                                             |                                                                                                                                                                            |
|-------------------------------------------------------------------------------------------------------------------------------------------------------------------------------------------------------------|----------------------------------------------------------------------------------------------------------------------------------------------------------------------------|
| <ul style="list-style-type: none"> <li>• for example, PE100 for the reactor plus metal subunits</li> <li>• pipes and pumps</li> <li>• use of CH<sub>4</sub> gas</li> <li>• stainless steel tanks</li> </ul> | <ul style="list-style-type: none"> <li>• for example, PE100 for the reactor plus metal subunits</li> <li>• Pipes and pumps</li> <li>• Use of CH<sub>4</sub> gas</li> </ul> |
|-------------------------------------------------------------------------------------------------------------------------------------------------------------------------------------------------------------|----------------------------------------------------------------------------------------------------------------------------------------------------------------------------|

##### Type of incoming streams

- |                                                                                                                                                                                                         |                                                                                                                                                                        |
|---------------------------------------------------------------------------------------------------------------------------------------------------------------------------------------------------------|------------------------------------------------------------------------------------------------------------------------------------------------------------------------|
| <ul style="list-style-type: none"> <li>• Blackwater / kitchen refuse</li> <li>• Industrial organic residues</li> <li>• COD concentration between 10–50 g COD/L If the ambient temperature is</li> </ul> | <ul style="list-style-type: none"> <li>• Blackwater / kitchen refuse</li> <li>• Industrial organic residues</li> <li>• COD concentration ca &gt; 50 g COD/L</li> </ul> |
|---------------------------------------------------------------------------------------------------------------------------------------------------------------------------------------------------------|------------------------------------------------------------------------------------------------------------------------------------------------------------------------|

- $\geq 20\text{ }^{\circ}\text{C}$ , then also concentrations below  $10\text{ g COD/L}$  can be allowed
- no further input streams needed, provided enough nutrients are present
- Depending on the flow of the waste stream different systems can be used
- Normally, no further input streams needed (provided enough nutrients are present, which normally is the case for domestic waste streams)

### Operation

- Mesophilic conditions ( $\geq 20\text{ }^{\circ}\text{C} - 35^{\circ}\text{C}$ ); thermophilic ( $55^{\circ}\text{C}$ ) conditions are researched for more concentrated streams
- (semi) continuous flow
- Mesophilic conditions ( $\geq 20\text{ }^{\circ}\text{C} - 35\text{ }^{\circ}\text{C}$ )
- (semi) continuous flow
- Mixing

### Maintenance

- Removal of potential scums layers
- Regular sludge discharge, e.g. once a month
- Removal of potential scums layers
- Maintenance of the settling layer in CSTR system

### Connecting NBS units

- Not applied
- Not applied

### Connecting supporting units

- Source separation Toilet (ADD)
- Vacuum unit (ADD)
- Kitchen grinder for kitchen refuse\*
- Source separation Toilet (ADD)
- Vacuum unit (ADD)
- Kitchen grinder for kitchen refuse

## OUTPUTS

### Type of outgoing streams

#### Liquid effluent

- ca 30–40% of the input COD concentration
- ca 60–70% of the input P concentration
- ca 70–80 % of the input N concentration
- ca 90% of the input K concentration
- Micro-pollutants
- Micro-nutrients
- Pathogens

#### Sludge

- ca 10–20% of the input COD concentration
- ca 30–40% of the input P concentration

#### Effluent:

- ca 50% of the input COD concentration
- 100% of the input P concentration
- 100 % of the input N concentration
- 100% of the input K concentration
- Micro-nutrients
- Micro-pollutants
- Pathogens

#### Biogas

- Ca 50% of input COD converted to  $\text{CH}_4$ . Biogas also contains (depending on nature input) 20–40%  $\text{CO}_2$  and other (trace) gasses.

- ca 20–30 % of the input N concentration
- ca 10% of the input K concentration
- Micro-pollutants
- Micro-nutrients
- Pathogens

#### Biogas

- Ca 40-60% of input COD converted to CH<sub>4</sub>. Biogas also contains (depending on nature input) 20-40% CO<sub>2</sub> and other (trace) gasses.

#### Co-benefits and limitations

- |                                                                                                                                                                                                                                                                                                                      |                                                                                                                                                                                                                                            |
|----------------------------------------------------------------------------------------------------------------------------------------------------------------------------------------------------------------------------------------------------------------------------------------------------------------------|--------------------------------------------------------------------------------------------------------------------------------------------------------------------------------------------------------------------------------------------|
| <ul style="list-style-type: none"> <li>• Energy production instead of consumption when applying aerobic treatment.</li> <li>• Nutrients are retained in the effluent and can be recovered for use as a fertiliser in agriculture</li> <li>• Sludge can be reused in agriculture after a disinfection step</li> </ul> | <ul style="list-style-type: none"> <li>• Energy production instead of consumption when applying aerobic treatment</li> <li>• Nutrients are retained in the effluent and can be recovered for use as a fertiliser in agriculture</li> </ul> |
|----------------------------------------------------------------------------------------------------------------------------------------------------------------------------------------------------------------------------------------------------------------------------------------------------------------------|--------------------------------------------------------------------------------------------------------------------------------------------------------------------------------------------------------------------------------------------|

#### Risks

- |                                                                                                                                            |                                                                                                                                                                          |
|--------------------------------------------------------------------------------------------------------------------------------------------|--------------------------------------------------------------------------------------------------------------------------------------------------------------------------|
| <ul style="list-style-type: none"> <li>• Poor pathogen removal (except for the thermophilic systems)</li> <li>• Explosive risks</li> </ul> | <ul style="list-style-type: none"> <li>• Poor pathogen removal</li> <li>• Effluent contains non converted CODs (including biomass)</li> <li>• Explosive risks</li> </ul> |
|--------------------------------------------------------------------------------------------------------------------------------------------|--------------------------------------------------------------------------------------------------------------------------------------------------------------------------|

#### Connecting NBS units

- |                                                                                                                                                                  |                                                                                                                                                                  |
|------------------------------------------------------------------------------------------------------------------------------------------------------------------|------------------------------------------------------------------------------------------------------------------------------------------------------------------|
| <ul style="list-style-type: none"> <li>• Photobioreactors (NBS 48)</li> <li>• Treatment wetlands (NBS 21)</li> <li>• Aerobic water treatment (NBS 27)</li> </ul> | <ul style="list-style-type: none"> <li>• Photobioreactors (NBS 48)</li> <li>• Treatment wetlands (NBS 21)</li> <li>• Aerobic water treatment (NBS 27)</li> </ul> |
|------------------------------------------------------------------------------------------------------------------------------------------------------------------|------------------------------------------------------------------------------------------------------------------------------------------------------------------|

#### Connecting supporting units

- |                                                                                                                                                                                                                                                                                                                                                                                            |                                                                                                                                                                                                                                                                                                                                                                                                                                                               |
|--------------------------------------------------------------------------------------------------------------------------------------------------------------------------------------------------------------------------------------------------------------------------------------------------------------------------------------------------------------------------------------------|---------------------------------------------------------------------------------------------------------------------------------------------------------------------------------------------------------------------------------------------------------------------------------------------------------------------------------------------------------------------------------------------------------------------------------------------------------------|
| <ul style="list-style-type: none"> <li>• A flare or gas storage is needed to prevent emission of excess methane gas*</li> <li>• Sulfur treatment unit for biogas use for power and/or heat production*</li> <li>• Nutrient recovery unit (P and N precipitation and stripping)</li> <li>• Membrane systems (disinfection, removal of remaining COD and organic micropollutants)</li> </ul> | <ul style="list-style-type: none"> <li>• A flare or gas storage is needed to prevent emission of excess methane gas*</li> <li>• Sulfur treatment unit for biogas use for power and/or heat production*</li> <li>• Solid/liquid separation system (membrane, settler, ...)</li> <li>• Nutrient recovery unit (P and N precipitation and stripping)</li> <li>• Membrane systems (disinfection, removal of remaining COD and organic micropollutants)</li> </ul> |
|--------------------------------------------------------------------------------------------------------------------------------------------------------------------------------------------------------------------------------------------------------------------------------------------------------------------------------------------------------------------------------------------|---------------------------------------------------------------------------------------------------------------------------------------------------------------------------------------------------------------------------------------------------------------------------------------------------------------------------------------------------------------------------------------------------------------------------------------------------------------|

#### FURTHER READINGS

- Sanitation technology library: details and data sources for appropriateness profiles and transfer coefficients - Packages - ERIC-open (eawag.ch). Data are associated to this publication. <https://doi.org/10.1016/j.watres.2020.116281>
- de Graaff, M.S., Temmink, H., Zeeman, G. & Buisman, C.J.N. (2010). Anaerobic Treatment of Concentrated Black Water in a UASB Reactor at a Short HRT. *Water* 2010, 2, 101-119. <https://doi.org/10.3390/w2010101>
- Wendland, C., Deegener, S., Behrendt, J., Toshev, P. & Otterpohl, R. (2007). Anaerobic digestion of blackwater from vacuum toilets and kitchen refuse in a continuous stirred tank reactor (CSTR). *Water Science & Technology*, 55, 7, 187–194. <https://doi.org/10.2166/wst.2007.144>
- Chen, G.-H., van Loosdrecht, M.C.M., Ekama, G.A. & Brdjanovic, D. (eds) (2020). *Biological Wastewater Treatment: Principles, Modelling and Design: Examples & Exercises*. IWA Publishing, pp 866. <https://doi.org/10.2166/9781789060362>

## **AEROBIC (POST) TREATMENT (including Nitrification (NBS 27) of Urine)**

### **INPUTS**

#### **Construction**

- For example, PE100 for the reactor plus metal subunits
- Aeration unit

#### **Type of incoming streams**

- Grey water with a COD of ca 0.5 g/L or pre-treated grey water (e.g. bioflocculation) with a COD of ca. 250 g COD/L
- Oxygen (air)
- Anaerobically treated black water after nutrient recovery
- Urine

#### **Operation**

- Continuous flow or SBR
- Supply of oxygen
- No temperature control
- Different redox zones for N & P removal
- Potentially including a membrane (MBR)

#### **Maintenance**

- Pump and piping systems
- Compressed air systems and blowers

#### **Connecting NBS units**

- Anaerobic digestion unit (NBS 26)

#### **Connecting supporting units**

- Source separation toilet (urine) (ADD)
- Evaporation system
- Odour control units (e.g. biofilter)

- Nutrient recovery unit (P and N precipitation and stripping) (SU 3, SU 4)

## OUTPUTS

### Type of outgoing streams

- Liquid effluent, quality (N&P content) depending on set-up for N&P removal; high COD removal (up to 90%)
- Sludge (Ca 40% of incoming COD)

### Co-benefits and limitations

- High effluent quality
- If combined with MBR reuse of high-quality water is possible and allows for compact, small footprint and low sludge production

### Risks

- Effluent may still contain significant nitrogen and phosphorus concentrations (eutrophication risk)

### Connecting NBS units

- Treatment wetlands (NBS 21)

### Connecting supporting units

- Solid/liquid separation unit (e.g. settler) (SU 7)
- Adsorption; activated carbon unit for micropollutants removal (SU 9)
- Disinfection (UV, free chlorine) (SU 5)

## FURTHER READINGS

- Yan, Z., Cheng, S., Zhang, J., Saroj, D. P., Mang, H. P., Han, Y., ... & Li, Z. (2021). Precipitation in urine source separation systems: Challenges for large-scale practical applications. *Resources, Conservation and Recycling*, 169, 105479. <https://doi.org/10.1016/j.resconrec.2021.105479>
- Nolde, E., (2014). Decentralized water and energy recycling in buildings: A cornerstone for water, energy and CO2 emissions reduction. In: Water and Efficiency Conference 2014. Brighton: pp. 61- 72. Accessable at: [https://www.watefnetwork.co.uk/files/default/resources/Conference2014/WATEFCON\\_2014\\_presentations/SUDS\\_and\\_alternative\\_water\\_supply/06-NOLDE.pdf](https://www.watefnetwork.co.uk/files/default/resources/Conference2014/WATEFCON_2014_presentations/SUDS_and_alternative_water_supply/06-NOLDE.pdf) (accessed on 05-4-21)
- Fumasoli, A.; Etter, B.; Sterkele, B.; Morgenroth, E.; Udert, K.M.. Operating a pilot-scale nitrification/distillation plant for complete nutrient recovery from urine. *Water Sci. Technol.* 2016, 73 (1): 215–222. doi: <https://doi.org/10.2166/wst.2015.485>
- Özel-Duygan, D.B.; Udert, K.M.; Remmele, A.; McArdell, C.S. Removal of pharmaceuticals from human urine during storage, aerobic biological treatment, and activated carbon adsorption to produce a safe fertilizer. *Resources, Conservation & Recycling* 166 (2021), <https://doi.org/10.1016/j.resconrec.2020.105341>
- Li, A.; Wichmann, K.; Otterpohl, R. Review of the technological approaches for grey water treatment and reuses. *Science of The Total Environment*, 2009, 407 (11); 3439-3449. <https://doi.org/10.1016/j.scitotenv.2009.02.004>

- Bukovskyi, A.; Leal, L.H.; Rijnaarts, H.H.M.; Zeeman, G. Fate of pharmaceuticals in full-scale source separated sanitation system. *Water Research* 2015, 85; 384-392. <https://doi.org/10.1016/j.watres.2015.08.045>
- Ghunmi, L.A.; Zeeman, G.; Fayyad, M.; van Lier, J.B. Grey water treatment in a series anaerobic – Aerobic system for irrigation. *Bioresource Technology*, 2010, 101 (1), 41-50. <https://doi.org/10.1016/j.biortech.2009.07.056>

## DECENTRALIZED SOLID WASTE ANAEROBIC (ADD) TREATMENT IN URBAN AREAS

### INPUTS

#### Construction

- Processes with treatment capacity from 10 to 200 t/year for micro-anaerobic digesters (micro AD)
- These technologies can be classified into two main groups:
  - Continuous technologies
  - Batch type technologies

#### Type of incoming streams

- Organic fraction of the municipal solid waste
- Food waste (FW)
- Co-substrate (Green waste from private gardens, Green waste from public areas, Paper towel from mass and commercial catering)
- Liquid addition for adjusting humidity level

#### Operation

- Sludge retention time (SRT): 30-40 days
- Temperature mostly mesophilic AD (35 to 40°C)
- In the case of batch mode process: multiple batches needed for flattening the biogas production rate in time
- In the case of semi-continuous process (daily or weekly)
- pH monitoring
- Liquid percolation and recirculation

#### Maintenance

- Pump and piping for continuous systems
- Sand settling layer removal for continuous systems
- Scum layer prevention
- Sulfur filter exchange
- For batch systems filling/emptying required and leave sufficient inoculum for the next batch

#### Connecting NBS units

- Not applied

#### Connecting supporting units

- Pre-treatment units (including a sorting step, a storage step, a shredding step, a water addition step and/or a mixing step)

## OUTPUTS

### Type of outgoing streams

- Liquid and solid digestates (fertilizers, organic amendments)
- Biogas

### Co-benefits and limitations

- Keep fertilizers and organic amendments in urban areas

### Risks

- Odour generation during storage of biowaste
- The design of the micro AD equipment should take into account size limitations of the local urban planning rules
- Biogas leakages
- Explosive risks
- Pathogen risks

### Connecting NBS units

- Composting (NBS 23)
- Hydroponics (NBS 45)
- Photobioreactors (NBS 48)

### Connecting supporting units

- Sulphur treatment unit for biogas use for power and/or heat production
- Solid/liquid separation unit (SU 7)
- Nutrient recovery unit (P and N precipitation and stripping) (SU 3, SU 4)
- Evapo-concentration to recover fertilizing nutrients
- Gas treatment and injection units for direct injection in national gas network

## FURTHER READINGS

- Walker, M., Theaker, H., Yaman, R., Poggio, D., Nimmo, W., Bywater, A., ... & Pourkashanian, M. (2017). Assessment of micro-scale anaerobic digestion for management of urban organic waste: A case study in London, UK. *Waste Management*, 61, 258-268. <https://doi.org/10.1016/j.wasman.2017.01.036>
- González, R., Hernández, J. E., Gómez, X., Smith, R., Arias, J. G., Martínez, E. J., & Blanco, D. (2020). Performance evaluation of a small-scale digester for achieving decentralised management of waste. *Waste Management*, 118, 99-109. <https://doi.org/10.1016/j.wasman.2020.08.020>
- Nguyen, P. D., Tran, N. S. T., Nguyen, T. T., Dang, B. T., Le, M. T. T., Bui, X. T., ... & Ngo, H. H. (2021). Long-term operation of the pilot scale two-stage anaerobic digestion of municipal biowaste in Ho Chi Minh city. *Science of the Total Environment*, 766, 142562. <https://doi.org/10.1016/j.scitotenv.2020.142562>
- Angeli, J. B., Morales, A., LeFloc'h, T., Lakel, A., & Andres, Y. (2018). Anaerobic digestion and integration at urban scale: feedback and comparative case study. *Energy, Sustainability and Society*, 8(1), 1-23. <https://doi.org/10.1186/s13705-018-0170-3>
- de Araújo, V. O., Silva, F. A. T., Marotta, H., Madeira, J. G. F., Rodrigues, C. A. F., do Carmo, D. D. F., & Fiaux, S. B. (2021). New Compact Biodigester Model for Organic Waste Treatment in Urban Residences and Buildings. *Journal of Environmental Engineering*, 147(2), 04020156.
- Bautista Angeli, J. R., LeFloc'h, T., Lakel, A., Lacarrière, B., & Andres, Y. (2021). Anaerobic digestion of urban wastes: integration and benefits of a small-scale system. *Environmental Technology*, 1-12. <https://doi.org/10.1080/09593330.2021.1921857>

**Table S2 Supplementary Materials B**

**NBS supporting units**

The NBS supporting units described in this paper and their attributed numbers (given in brackets) are extracted from the complete list of NBS supporting units given in the introductory paper that presents a framework for addressing circularity challenges in cities with NBS (Langergraber et al., 2021). However, new NBS supporting units are being described and applied to enable more efficient resource recovery in the cities; therefore, also additional NBS supporting units are addressed in this paper and described below – market as additional (ADD).

| SOLID/LIQUID SEPARATION, CENTRIFUGATION, SETTLING TANK (SU 7)                                                                                                                                                                                                                                                                                                                                                                                                                                                                                                                                                                              |
|--------------------------------------------------------------------------------------------------------------------------------------------------------------------------------------------------------------------------------------------------------------------------------------------------------------------------------------------------------------------------------------------------------------------------------------------------------------------------------------------------------------------------------------------------------------------------------------------------------------------------------------------|
| <b>INPUTS</b>                                                                                                                                                                                                                                                                                                                                                                                                                                                                                                                                                                                                                              |
| <b>Construction</b>                                                                                                                                                                                                                                                                                                                                                                                                                                                                                                                                                                                                                        |
| Ultrasound sedimentation unit for separation of algae-bacterial biomass from photobioreactors (in development):                                                                                                                                                                                                                                                                                                                                                                                                                                                                                                                            |
| <ul style="list-style-type: none"> <li>• excavation (optional; can be aboveground)</li> <li>• concrete or prefabricated plastic impermeable basin with 1 chamber</li> <li>• inflow and outflow pipes and pumps</li> <li>• ultrasound unit</li> </ul>                                                                                                                                                                                                                                                                                                                                                                                       |
| Sludge dewatering units:                                                                                                                                                                                                                                                                                                                                                                                                                                                                                                                                                                                                                   |
| <ul style="list-style-type: none"> <li>• Centrifugation <ul style="list-style-type: none"> <li>○ centrifugation unit</li> <li>○ pump</li> <li>○ polymer dosage</li> </ul> </li> <li>• Belt (filter) press as a dewatering system: <ul style="list-style-type: none"> <li>○ pump</li> <li>○ polymer dosage</li> <li>○ press</li> </ul> </li> <li>• Sludge cake conveyor <ul style="list-style-type: none"> <li>○ compressed air pump</li> </ul> </li> <li>• Sludge drying bed: <ul style="list-style-type: none"> <li>○ area, or bed</li> <li>○ drainage system</li> <li>○ plants (e.g. <i>Phragmites australis</i>)</li> </ul> </li> </ul> |
| Settling tank:                                                                                                                                                                                                                                                                                                                                                                                                                                                                                                                                                                                                                             |
| <ul style="list-style-type: none"> <li>• Circular or rectangular tanks</li> <li>• Pumps</li> <li>• Collection tank (incoming stream greywater)</li> </ul>                                                                                                                                                                                                                                                                                                                                                                                                                                                                                  |
| <b>Type of incoming streams</b>                                                                                                                                                                                                                                                                                                                                                                                                                                                                                                                                                                                                            |
| <ul style="list-style-type: none"> <li>• Ultrasound sedimentation unit: algae-bacteria biomass from photobioreactors, blackwater, greywater</li> <li>• Centrifugation: primary &amp; secondary aerobic sludge (1-8% TS), anaerobically digested biosolids (1-20%)</li> <li>• Belt (filter) press: primary &amp; secondary aerobic sludge (1-8% TS), anaerobically digested biosolids (1-20%)</li> </ul>                                                                                                                                                                                                                                    |

- Sludge drying bed: digested solids (sludges), 60-160 kg TS m<sup>-2</sup> year
- Settling tank: wastewater (grey), blackwater, faeces, brownwater, organic solid waste

#### Operation

- Ultrasound sedimentation unit: wavelength, duration of operation
- Centrifugation: polymer addition (to reach desired dewatering level) (2.5-15 g/kg TS)
- Belt (filter) press: polymer addition (to reach desired dewatering level) (1.5-12.5 g/kg TS)
- Sludge drying bed: loading rates
- Settling tank: hydraulic retention time

#### Maintenance

- Ultrasound sedimentation unit
  - regular removal of accumulated algae-bacterial biomass
  - service and replacement of ultrasound unit and pumps (every ca 5 years)
- Centrifugation: odour control/ventilation
- Belt (filter) press: service and replacement of press and pumps.
- Sludge drying beds: removal of accumulated biomass (every ca 5-10 years)
- Settling tank: scum removal and desludging

#### Connecting NBS units

- Photobioreactor (48)
- Anaerobic treatment (26)
- Aerobic treatment (27)
- Treatment wetland (21)

#### Connecting NBS supporting units

- Adsorption, activated carbon (S9)
- Biochar/Hydrochar (S6)

### OUTPUTS

#### Type of outgoing streams

Ultrasound sedimentation unit:

- algae-bacterial biomass to be used directly or indirectly as a fertilizer, biostimulants, biofuel, feed etc. and treated effluent from photobioreactor for irrigation/fertigation
- blackwater: nutrient rich stream (comparable to UASB) plus primary sludge as a resource recovery
- greywater: low solid effluent (irrigation) plus primary sludge as a resource recovery

Centrifugation

- Dry sludge cake (20-30%) plus
- Centrate (liquid phase) needs to be used for resource recovery

Belt press: very dry sludge cake plus nutrient rich liquid to be used...

Sludge drying beds: dry matter (compost) as a fertilizer, soil improvement

Settling tank: liquid to be used for resource recovery (irrigation water), biosolids for resource recovery

#### Co-benefits and limitations

- Dry material (less transport costs, if any)
- Centrifugation: grit removal necessary, skilled personnel

- Belt press: hydraulically limited in high throughput, sludge grinder required; sensitive to incoming sludge feed characteristics; no automatic operation
- Sludge drying beds: large area, stabilised sludge for soil improvement, labour intensive, low operation costs
- Settling tank: simple technique, regular removal of scum and biosolids needed

#### Risks

- Ultrasound sedimentation unit: unstable efficiency, resuspension
- Centrifugation: potential high SS in centrate
- Sludge drying beds: climatic effects
- Odour
- Sludge loaded with potentially toxic pollutants (e.g. metals)

#### Connecting NBS units

- (public) Green spaces (NBS 37–43)
- Productive gardens, urban forest, urban farms and orchards (NBS 49-51)
- Soil improvement and conservation (NBS 33)
- Vertical greening systems & green roofs (NBS 13–20)

#### Connecting NBS supporting units

- Phosphate precipitation (SU 3)
- Ammonia stripping (SU 4)
- Disinfection (SU 5)
- Membrane filtration (SU 8)

#### FURTHER READINGS

- Metcalf & Eddy, Wastewater engineering, treatment and resource recovery International 5<sup>th</sup> edition, McGraw Hill, 2014. ISBN 9780073401188.
- More info on settlers: <https://sswm.info/taxonomy/term/3930/settler>
- K. Tuantet, (2015). Microalgae cultivation for nutrient recovery from human urine. PhD thesis Wageningen University. <https://edepot.wur.nl/337297>
- Bosma, R., Van Spronsen, W. A., Tramper, J., & Wijffels, R. H. (2003). Ultrasound, a new separation technique to harvest microalgae. *Journal of Applied Phycology*, 15(2), 143-153. <https://doi.org/10.1023/A:1023807011027>

#### Urine Diverting TOILETS

(ADD)

##### INPUTS

##### Construction

- Ceramic, plastics, metal

##### Type of incoming streams

- Human excreta
- Toilet paper or other cleansing material
- Bulk material (composting toilet)
- Air (for ventilation of dry toilet)
- Water (flush toilet)
- Electricity (for ventilation of dry toilet)

##### Operation

- Addition of bulk material (in separating composting toilet)
- Flushing of faeces (in non-dry separating toilets)

#### **Maintenance**

- Cleaning
- Maintenance of mechanical parts or ventilation (composting toilet)
- Prevention of clogging (precipitation)/addition of acid
- Emptying of compost chamber (composting toilet)

#### **Connecting NBS units (*indirectly to food and biomass production*)**

- Aquaculture (NBS 44)
- Hydroponic and soilless technologies (NBS 45)
- Organoponic/Bioponic (NBS 46)
- Aquaponic farming (NBS 47)
- Productive garden (NBS 49)
- Urban farms and orchards (NBS 51)

#### **Connecting NBS supporting units**

- -

### **OUTPUTS**

#### **Type of outgoing streams**

- Faecal free Urine + water (depending on flushing system)
- Faecal matter, cleansing material, bulk material (composting toilet)
- Faecal matter, cleansing material with water (flush toilet)

#### **Co-benefits and limitations**

- Nutrient recovery possible
- Soil conditioner from composted human faecal matter possible
- Substantial water saving
- Storage, handling, and processing of urine: e.g., possible ammonia loss

#### **Risks**

- Micro-contaminants in faecal matter and urine
- Risk related to composting. Pathogens, too much or too little water

#### **Connecting NBS units**

- Anaerobic treatment (NBS 26)
- Aerobic (post) Treatment (NBS 27)
- Composting (NBS 23)

#### **Connecting NBS supporting units**

- Phosphate precipitation (SU 3)
- Ammonia stripping (SU 4)
- Disinfection (SU 5)

### **FURTHER READINGS**

- WEDC 2014, A Collection of contemporary Toilet Design, <https://www.lboro.ac.uk/research/wedc/resources/pubs/books/cctd/> (accessed Apr. 6, 2021)
- <https://www.slu.se/en/departments/energytechnology/projects/kretslopp/productiveon-site-sanitationsystem/>
- <https://www.eawag.ch/en/departments/sandec/publications/compendium/> (accessed Apr. 6, 2021)
- Hakan Jönsson (2001). Urine separation - Swedish experiences. EcoEng Newsletter 1
- Gundlach et al. 2021 (EAWAG) Sanisphere: <https://sanisphere-fr.com/en/references-2/>
- Ecodomeo: <https://www.ecodomeo.com/>
- Ecosec: <http://ecosec.fr/references/>
- Wostman: <https://www.wostman.se/en/products>

| WATER FREE URINAL (ADD)                                                                                                                                                                                                                                                                             |  |
|-----------------------------------------------------------------------------------------------------------------------------------------------------------------------------------------------------------------------------------------------------------------------------------------------------|--|
| INPUTS                                                                                                                                                                                                                                                                                              |  |
| <b>Construction</b>                                                                                                                                                                                                                                                                                 |  |
| <ul style="list-style-type: none"> <li>• Lightweight high-tech polycarbonate or ceramic urinal</li> <li>• MB Active Trap</li> <li>• Transport pipe urine to storage</li> </ul>                                                                                                                      |  |
| <b>Type of incoming streams</b>                                                                                                                                                                                                                                                                     |  |
| <ul style="list-style-type: none"> <li>• Urine</li> </ul>                                                                                                                                                                                                                                           |  |
| <b>Operation</b>                                                                                                                                                                                                                                                                                    |  |
| <ul style="list-style-type: none"> <li>• MB Active Trap should be replaced after 7000 urinations</li> </ul>                                                                                                                                                                                         |  |
| <b>Maintenance</b>                                                                                                                                                                                                                                                                                  |  |
| <ul style="list-style-type: none"> <li>• Cleaning</li> <li>• Use of acid for avoiding precipitation</li> </ul>                                                                                                                                                                                      |  |
| <b>Connecting NBS units (<i>indirectly to food and biomass production</i>)</b>                                                                                                                                                                                                                      |  |
| <ul style="list-style-type: none"> <li>• Aquaculture (NBS 44)</li> <li>• Hydroponic and soilless technologies (NBS 45)</li> <li>• Organoponic/Bioponic (NBS 46)</li> <li>• Aquaponic farming (NBS 47)</li> <li>• Productive garden (NBS 49)</li> <li>• Urban farms and orchards (NBS 51)</li> </ul> |  |
| <b>Connecting NBS supporting units</b>                                                                                                                                                                                                                                                              |  |
| <ul style="list-style-type: none"> <li>• -</li> </ul>                                                                                                                                                                                                                                               |  |
| OUTPUTS                                                                                                                                                                                                                                                                                             |  |
| <b>Type of outgoing streams</b>                                                                                                                                                                                                                                                                     |  |
| <ul style="list-style-type: none"> <li>• Urine</li> </ul>                                                                                                                                                                                                                                           |  |
| <b>Co-benefits and limitations</b>                                                                                                                                                                                                                                                                  |  |
| <ul style="list-style-type: none"> <li>• No water use; therefore, large water saving</li> </ul>                                                                                                                                                                                                     |  |

- No connection to drinking water tap

#### Risks

- Microcontaminants (hormones, pharmaceuticals) in collected urine

#### Connecting NBS units

- Aerobic (post) treatment (NBS 27)

#### Connecting NBS supporting units

- Phosphate precipitation (SU 3)
- Ammonia stripping (SU 4)

#### FURTHER READINGS

- <https://www.saniwijzer.nl/projecten/afas-live/detail=13> (in Dutch)
- <https://www.saniwijzer.nl/projecten/villa-flora/detail=76> (in Dutch)

#### Water saving/water-free toilets without urine diversion

(ADD)

#### INPUTS

##### Construction

- Ceramic, plastics, metal toilets
- Vacuum collection system, including a vacuum pump or composting chamber
- Small diameter piping (vacuum)
- Foam Flush toilet and adapted tubing

##### Type of incoming streams

- Human excreta
- Toilet paper or other cleansing material
- Bulk material (composting toilet)
- Air for ventilation (composting toilet)
- Water (flush toilet)
- Electricity (vacuum toilet)
- Water
- Biodegradable soap (foam flush toilet)

##### Operation

- Electricity (for vacuum, ventilation, foam flush)
- Refilling of biodegradable soap (foam flush)
- Creating a vacuum by pump (vacuum toilet)

##### Maintenance

- Use of organic acid to prevent precipitates in tubing and pump
- Cleaning

#### Connecting NBS units (*indirectly to food and biomass production*)

- Aquaculture (NBS 44)
- Hydroponic and soilless technologies (NBS 45)
- Organoponic/Bioponic (NBS 46)
- Aquaponic farming (NBS 47)
- Productive garden (NBS 49)
- Urban farms and orchards (NBS 51)

#### Connecting NBS supporting units

## OUTPUTS

### Type of outgoing streams

- Blackwater, including maximum 1 litre flush water per flush
- Ash (incinerating toilet)

### Co-benefits and limitations

- Substantial water saving
- Concentrated output (black water) allows energy production (anaerobic treatment) and nutrient recovery (for example struvite precipitation)
- Use of small diameter piping
- Toilet installation is flexible (anywhere in the house/office)
- Ultra-vacuum toilets with even lower flush volume (0.5 l flush<sup>-1</sup>)

### Risks

- Relies on electricity (VC, CT, foam flush)
- (risk related to composting. Pathogens, too much or too little water)

### Connecting NBS units

- Anaerobic treatment (NBS 26)
- Aerobic treatment (NBS 27)

### Connecting NBS supporting units

- Phosphate precipitation (SU 3)
- Ammonia stripping (SU 4)
- Disinfection (SU 5)
- Biochar/hydrochar (SU 6)
- Solid/liquid separation (SU 7)

## FURTHER READINGS

- <https://www.cooperative-equilibre.ch/projets/cressy/historique-de-limmeuble-de-cressy/>
- <https://www.saniwijzer.nl/projecten/desah---lemmerweg-oost-ii/detail=483> (in Dutch)
- <https://www.saniwijzer.nl/projecten/desah---noorderhoek-zwartwaterbehandeling/detail=52> (in Dutch)
- <https://www.saniwijzer.nl/projecten/villa-flora/detail=76> (in Dutch)
- <https://www.saniwijzer.nl/projecten/nioo-knaw/detail=66> (in Dutch)
- Project Run4life - Demonstration sites <https://run4life-project.eu/demosites/>
- <https://www.hamburgwatercycle.de/en/the-jenfelder-au-neighbourhood/the-hwc-in-the-jenfelder-au>
- <https://www.susana.org/en/knowledge-hub/resources-and-publications/library/details/59>
- <https://bullittcenter.org/building/building-features/waste-not/>
- Todt, D., Bisschops, I., Chatzopoulos, P., van Eekert, M.H.A. (2021). Practical Performance and User Experience of Novel DUAL-Flush Vacuum Toilets. Water 13, no. 16: 2228. <https://doi.org/10.3390/w13162228>

## DISINFECTION (UV, CAVITATION, OZONE, CHLORINATION)

(SU 5)

## INPUTS

### **Construction**

- UV lamps
- Reactors (concrete)
- Pumps
- Storage tank for chemicals

### **Type of incoming streams**

- Treated effluent of biological systems
- Concentrated streams (thermal disinfection)
- Solid free water

### **Operation**

- Chemicals (chlorine from liquid solution or generated onsite via electrolysis)
- Energy/electricity
- Check turbidity

### **Maintenance**

- Cleaning (biofilm and scaling on UV lamps)
- Monitoring the intensity of UV light (energy, wavelength)
- Check occurrence of undesired crystallisation

### **Connecting NBS units**

- Anaerobic treatment (NBS 26)
- Aerobic (post) treatment (NBS 27)
- Composting (NBS 23)

### **Connecting NBS supporting units**

- Rainwater harvesting (SU 1)
- Phosphate precipitation (SU 3)
- Ammonia stripping (SU 4)
- Solid/liquid separation (SU 7)
- Membrane filtration (SU 8)
- Adsorption (SU 9)

## **OUTPUTS**

### **Type of outgoing streams**

- Pathogen free water
- Pathogen free solid streams (after disinfection)

### **Co-benefits and limitations**

- Potential removal organic MP (depending on the type of MP)
- Ozone only for meso/macro scale

### **Risks**

- -

### **Connecting NBS units**

- Composting (NBS 23)
- Aquaculture (NBS 44)
- Hydroponic and soilless technologies (NBS 45)
- Aquaponic farming (NBS 47)

### Connecting NBS supporting units

- Phosphate precipitation (SU 3)
- Ammonia stripping (SU 4)
- Solid/liquid separation (SU 7)
- Membrane filtration (SU 8)
- Adsorption (SU 9)

### FURTHER READINGS

- Foglia, A., Andreola, C., Cipolletta, G., Radini, S., Akyol, Ç., Eusebi, A. L., ... & Fatone, F. (2021). Comparative life cycle environmental and economic assessment of anaerobic membrane bioreactor and disinfection for reclaimed water reuse in agricultural irrigation: A case study in Italy. *Journal of Cleaner Production*, 293, 126201. <https://doi.org/10.1016/j.jclepro.2021.126201>
- A.N. Angelakis, S.A. Snyder Wastewater treatment and reuse: past, present, and future *Water (Switzerland)*, 7 (2015), pp. 4887-4895, <https://doi.org/10.3390/w7094887>
- Rizzo, L., Gernjak, W., Krzeminski, P., Malato, S., McArdell, C. S., Perez, J. A. S., ... & Fatta-Kassinos, D. (2020). Best available technologies and treatment trains to address current challenges in urban wastewater reuse for irrigation of crops in EU countries. *Science of the Total Environment*, 710, 136312. <https://doi.org/10.1016/j.scitotenv.2019.136312>

Salgot, M., & Folch, M. (2018). Wastewater treatment and water reuse. *Current Opinion in Environmental Science & Health*, 2, 64-74. <https://doi.org/10.1016/j.coesh.2018.03.005>

## PHOSPHORUS PRECIPITATION AND RECOVERY

(SU 3)

### INPUTS

#### Construction

Treatment wetlands:

- Mixing the media (sand) with calcite, crushed marble or other materials to increase P-binding capacity. Additional (external) filtering unit can also be constructed where the media can be easily replaced after being saturated with P.
- P precipitation with aluminium salts in sedimentation tank prior to the wetland (aluminium polychloride (PAC) dosed by an airlift pump)

Treatment of source-separated black water:

- Precipitation with Mg or Ca in separate tank, typically after anaerobic treatment of black water in a CSTR or UASB reactor for biogas recovery.
- Typically, Mg-struvite is formed by crystallization after addition of a Mg-salt such as  $\text{MgCl}_2$  and/or in combination with pH increase  $> 9.0$
- The produced struvite (mostly  $\text{MgNH}_4\text{PO}_4 \cdot 6\text{H}_2\text{O}$ ) allows to recover P, which is listed as a critical raw material in the European Union, and mainly serves as fertilizer.

Treatment of source-separated urine:

- 94% struvite precipitation efficiency but merely 55% of the crystals were removed and recovered. pH controlled at pH=4 to remove  $\text{CO}_2$ . Then treatment in 2 m<sup>3</sup> 4 HRT reactor. NaOH, 50%) addition to ensure a pH of greater than 8.5. The removal of  $\text{CO}_2$  in the previous stage reduces the buffering capacity of the urine, and thus little NaOH was needed to raise the pH to 8.5. Based on the measured phosphate concentrations in the  $\text{CO}_2$

stripping tank, magnesium salt was dosed into the struvite reactor at a ratio of 1.6 mol Mg mol<sup>-1</sup> P. The form of magnesium salt used was MgCl<sub>2</sub> 6H<sub>2</sub>O initially, then MgOH, settling tank (2 m<sup>3</sup>, 4-h) HRT)

Phosphorous recovery using different reactive filter media

- Reactive filter media (like Polonite®, Filtralite®) with excellent capabilities of capturing phosphorus from both wastewater, and runoff water from farmland are used for phosphorus removal and recovery. They enable recycling the vital nutrient by returning it on productive farmlands.
- Polonite is a natural calcium silicate, achieves a phosphorus reduction of 100% in sewage water for new installations and over 90% if employed for a longer period of time. The technology function of Polonite is proven by over 20 years of research at The Royal Institute of Technology in Stockholm (KTH) and through over 6000 installed filter solutions for sewage.
- Filtralite® Nature P 0.5-4 filter media, produced from expanded clay material, with its highly porous structure, enables large microbial growth surface for biological filtration which means improved filter capacity and reduced operational costs. Filtralite® Nature P media, with its high content of limestone, improves phosphorus removal from waste and effluent waters.

### Type of incoming streams

Treatment wetlands:

- In case of P precipitation with PAC approx. 30 L of PAC per year per household is needed to reach <1.5 mg/L of total phosphorous at the outflow. Treatment of source-separated black water/urine:
- Blackwater UASB effluent or Black water CSTR effluent after solid separation
- Urine from water free urinal or separation toilet

Phosphorous recovery using different reactive filter media

- Urban storm water
- Domestic/household wastewater

### Operation

Treatment wetlands:

- TW with P-sorbing media: P monitoring to check the filter saturation

Treatment of source-separated blackwater/urine:

- many operational conditions influence the crystallization process and struvite quality: influent P concentration, crystal retention time, TSS concentration, viscosity, presence of colloidal substance, Mg:P ratio, temperature, pH and mixing conditions;
- addition of Mg: MgCl<sub>2</sub>, Mg(OH)<sub>2</sub>, MgO, to ratio's of Mg:PO<sub>4</sub> of 1:1 and higher. 90% removal of P observed in black water at ratio 1.5:1 at pH=8 and 1.3:1 at pH=9 in vacuum collected blackwater;
- pH increase: base addition, CO<sub>2</sub> stripping, and other methods;
- the need for chemical addition might make the small-scale treatment of (anaerobic) effluents less feasible.

Phosphorous recovery using different reactive filter media

- Efficiency of phosphorus recovery process depends of type used reactive filters materials
- There are many operational conditions influencing the filtration process: hydraulic retention time, pH control, influent P concentration

### **Maintenance**

Treatment wetlands:

- TW with P-sorbing media: P monitoring to check the filter saturation
- Adding new PAC solution

Treatment of source-separated black water/urine:

- pH control
- Addition of chemicals and maintenance of dosing pumps
- Maintenance of mixer, piping and pumps (regular check for unwanted precipitation)
- Harvest of the struvite crystals

Phosphorous recovery using different reactive filter media

- pH control
- monitoring P level in effluent

### **Connecting NBS units**

- Anaerobic treatment (NBS 26)
- Aerobic treatment (NBS 27)

### **Connecting NBS supporting units**

- Ammonia stripping (SU 4)
- Disinfection (SU 5)
- Solid/liquid separation (SU 7)
- Separating toilets (SU 11)
- Water free urinal (SU 12)

## **OUTPUTS**

### **Type of outgoing streams**

Treatment wetlands (TW):

- TW with P binding material: inorganic media (calcite, marble) with adsorbed P
- Primary sludge enriched with P-PAC

Treatment of source-separated blackwater/urine:

- A large-scale and comprehensive study of the composition of struvite crystals has been carried out on 24 European production plants, accounting for 30% of the 80 struvite installations worldwide. Differences in morphology and particle size distribution were observed for struvite produced from different sources, but all samples showed a heavy metal content below the legal limits. In conclusion, the results highlight the suitability of most struvite to enter the EU fertilizer market.

Phosphorous recovery using different reactive filter media.

- There are thousands of installations with reactive filter media. Long-term phosphate removal in wastewater filtration systems is achieved.

### **Co-benefits and limitations**

Treatment of source-separated blackwater/urine:

- Removal of P -and partially N- in the blackwater treatment line as struvite, reduces the use and need of chemicals ( $\text{FeCl}_3$  for phosphate and COD source for denitrification) and energy (aeration for nitrification) for further downstream treatment of the wastewater.
- Controlled precipitation and recovery of struvite avoids the formation of unwanted precipitation further downstream which can cause severe clogging or damaging to pumps and piping.
- The examples above mainly focussed on ammonium-struvite, but K-struvite ( $\text{MgKPO}_4 \cdot 6\text{H}_2\text{O}$ ) or MKP is also an interesting fertilizer. K-struvite crystallization is an attractive technology to simultaneously recover phosphate and potassium from urine as well. Another example to recover P from wastewater is precipitation of calcium phosphate, e.g. as hydroxyapatite (HAP)

#### Risks

- Presence of organic material
- Potential bad smell of struvite (depends on source material)

#### Connecting NBS units

- (public) Green spaces (NBS 37–43)
- Productive gardens, urban forest, urban farms and orchards (NBS 49-51)
- Soil improvement and conservation (NBS 33)
- Vertical greening systems & green roofs (NBS 13–20)

#### Connecting NBS supporting units

- Ammonia stripping (SU 4)
- Disinfection (SU 5)
- Adsorption (SU 9)

#### FURTHER READINGS

- Brix, H., Arias, C.A., del Bubba, M. 2001. Media selection for sustainable phosphorous removal in subsurface constructed wetlands. *Water Science and Technology*, 44: 47-54. <https://doi.org/10.2166/wst.2001.0808>
- Arias, C.A., Brix, H., Johansen, N.H. (2003). Phosphorous removal from municipal wastewater in an experimental two-stage vertical flow constructed wetland system equipped with calcite filter, *Water Science and Technology*, 48: 51-58. <https://doi.org/10.2166/wst.2003.0279>
- Brix, H., Arias, C.A. (2005). The use of vertical flow constructed wetlands for on-site treatment of domestic wastewater: New Danish guidelines, *Ecological Engineering*, 25: 491-500 <https://doi.org/10.1016/j.ecoleng.2005.07.009>
- Wei, S.P., van Rossum, F., van de Pol, G.-J., Winkler, M.-K. H., 2018. Recovery of phosphorus and nitrogen from human urine by struvite precipitation, air stripping and acid scrubbing: A pilot study. *Chemosphere*, 212, 1030-1037, <https://doi.org/10.1016/j.chemosphere.2018.08.154>
- <https://www.kth.se/files/view/agak/5c6d4529175e1822a18fbf51/commercializing-polonite.pdf> (in Swedish)
- <http://kth.diva-portal.org/smash/get/diva2:1345945/FULLTEXT02.pdf>

- de Graaff, M.S., Temmink, H., Zeeman, G., & Buisman, C.J.N. (2011). Energy and phosphorus recovery from black water. *Water Science & Technology* 63(11), 2759-2765. <https://doi.org/10.2166/wst.2011.558>
- Doyle, J.D. & Parson, S.A. (2002). Struvite formation, control and recovery, *Water Research* 36(16), 3925-3940. [https://doi.org/10.1016/S0043-1354\(02\)00126-4](https://doi.org/10.1016/S0043-1354(02)00126-4)
- Bunce, J.T., Ndam, E., Ofiteru, I.D., Moore, A. & Graham, D.W. (2018). A review of phosphorus removal technologies and their applicability to small-scale domestic wastewater treatment systems. *Frontiers in Environmental Science*, 6, 8, <https://doi.org/10.3389/fenvs.2018.00008>
- Muys, M., Phukan, R., Brader, G., Samad, A., Moretti, M., Haiden, B., Pluchon, S., Roest, K., Vlaeminck, S.E. & Spiller, M. (2021). A systematic comparison of commercially produced struvite: Quantities, qualities and soil-maize phosphorus availability. *Science of The Total Environment*, 756, <https://doi.org/10.1016/j.scitotenv.2020.143726>
- <https://run4life-project.eu/wp-content/uploads/2017/10/H2020-Run4Life-Factsheet-Product-Struvite.pdf>
- Cunha, J.R., Schott, C., van der Weijden, R.D., Hernández Leal, L., Zeeman, G. & Buisman, C. (2020) Calcium phosphate granules recovered from black water treatment: A sustainable substitute for mined phosphorus in soil fertilization. *Resources, Conservation and Recycling*, 158, 104791. <https://doi.org/10.1016/j.resconrec.2020.104791>
- Renman, A., Renman, G., 2010. Long-term phosphate removal by the calcium–silicate material Polonite in wastewater filtration systems. *Chemosphere* 79 (6), 659-664
- KINGA ÁDÁM, TORE KROGSTAD, FADI R.D. SULIMAN & PETTER D. JENSSEN (2005) Phosphorous Sorption by Filtralite P—Small Scale Box Experiment, *Journal of Environmental Science and Health, Part A*, 40:6-7, 1239-1250, DOI: 10.1081/ESE-200055673
- Benzing, S., Couceiro, F., Barnett, S., Williams, J. B., Pearce, P. & Stanford, C. (2020). Impact of hydraulic retention time on phosphorus removal from wastewater using reactive media. *Water Science and Technology*, 82 (12), 2920-2928. <https://doi.org/10.2166/wst.2020.526>
- Filtralite®. (2009). Filtralite® Nature P 0,5-4. [https://www.\\_ltralite.com/sites/default/\\_les/pdfs/Product%20Data%20Sheet%20Filtralite%20Nature%20P%200%2C5-4%20v9.pdf](https://www._ltralite.com/sites/default/_les/pdfs/Product%20Data%20Sheet%20Filtralite%20Nature%20P%200%2C5-4%20v9.pdf)
- Hedstrom, A. (2006). Reactive filter materials for ammonium and phosphorus sorption in small scale wastewater treatment. Doktorsavhandling. Lulea tekniska universitet. <http://www.diva-portal.org/smash/record.jsf?pid=diva2%3A990306&dswid=-9250>
- Reddy, K. R. & Kumar, G. (2017). Permeable Reactive Filter Systems for the Treatment of Urban Stormwater Runoff with Mixed Pollutants, 508-517. <https://doi.org/10.1061/9780784480434.055>
- Vohla, C., Kõiv, M., Bavor, H. J., Chazarenc, F., & Mander, Ü. (2011). Filter materials for phosphorus removal from wastewater in treatment wetlands—A review. *Ecological Engineering*, 37(1), 70-89. <https://doi.org/10.1016/j.ecoleng.2009.08.003>

## AMMONIA STRIPPING

(SU 4)

### INPUTS

#### Construction

- Strip tank
- Scrub tank
- Pre-treatment
- Packaging material
- Chemical dosage system

#### Type of incoming streams

- High N concentration: anaerobic digestate (only integrated stripper, not for digestate)/liquid effluent
- Urine

#### Operation

- TSS removal
- pH adjustment, pH= 8-12
- Gas flow: 600:1 to 1200:1
- Temperature 2- 60/80°C (for pH=7.5-8.5)
- One operation mode: two columns (2 strippers, 1 scrubber, 0.75 m<sup>3</sup>, 0.3 m<sup>3</sup> packaging material ~ 178 m<sup>2</sup> m<sup>-3</sup> surface area. T= 35-40°C, pH=9 controlled by 50% NaOH dosage. Stripper 1 (flowrate of 7 m<sup>3</sup> h<sup>-1</sup> with counter-flow of air from the bottom. stripper 2 (8 m<sup>3</sup> h<sup>-1</sup> of effluent from stripper 1) HRT was 6.3 min for stripper 1, 5.5 min for stripper 2. Air in a closed-loop cycle (1500 m<sup>3</sup> h<sup>-1</sup>). The produced ammonia-rich air is then fed through the bottom of the scrubber while sulfuric acid solution (H<sub>2</sub>SO<sub>4</sub>, 96%) is fed from the top at 6.5 m<sup>3</sup> h<sup>-1</sup>. Counter-flows, 40% (NH<sub>4</sub>)<sub>2</sub>SO<sub>4</sub>, was produced.
- Another operation mode: typical temperature of 25-35°C, pH 11 (nearly 100% shift from ammonium to ammonia)

#### Maintenance

- Refer to Metcalf and Eddy
- Check on clogging

#### Connecting NBS units

- Anaerobic treatment (NBS 26)
- Aerobic (post) treatment (NBS 27)

#### Connecting NBS supporting units

- Struvite precipitation (SU 3)
- Disinfection (SU 5)
- Solid/liquid separation (SU 7)
- Membrane filtration (SU 8)
- Separating toilets (SU 11)
- Water free urinal (SU 12)

### OUTPUTS

#### Type of outgoing streams

- 5-83% of N<sub>in</sub> removed
- The removal and recovery efficiencies for nitrogen were 93% and 85%

- 20-40% (NH<sub>4</sub>)<sub>2</sub>SO<sub>4</sub> solution

#### Co-benefits and limitations

- Actually produce solely N containing fertiliser (for example NH<sub>4</sub>NO<sub>3</sub>)
- Effluent ready for struvite precipitation
- Alternative process: vacuum thermal stripping in combination with sorption
- Bad smell of products
- High energy costs and chemicals
- Applicability of N-stripping application depends on local circumstances like scale, temperature, availability of sustainable energy

#### Risks

- -

#### Connecting NBS units

- (public) Green spaces (NBS 37–43)
- Productive gardens, urban forest, urban farms and orchards (NBS 49-51)
- Soil improvement and conservation (NBS 33)
- Vertical greening systems & green roofs (NBS 13–20)

#### Connecting NBS supporting units

- Phosphate precipitation (SU 3)
- Disinfection (SU 5)
- Adsorption (SU 9)

#### FURTHER READINGS

- <https://run4life-project.eu/>
- Lorick, D., Macura, B., Ahlström, M. et al. (2020) Effectiveness of struvite precipitation and ammonia stripping for recovery of phosphorus and nitrogen from anaerobic digestate: a systematic review. *Environmental Evidence* 9, 27. <https://doi.org/10.1186/s13750-020-00211-x>
- Kinidi, L., Tan, I.A.W., Abdul Wahab, N.B., Tamrin, K.F.B., Hipolito, C.N., Salleh, S.F. (2018). Recent development in ammonia stripping process for industrial wastewater treatment. *International Journal of Chemical Engineering*, 3181087 <https://doi.org/10.1155/2018/3181087>
- Wei, S.P., van Rossum, F., van de Pol, G.-J., Winkler, M.-K. H., 2018. Recovery of phosphorus and nitrogen from human urine by struvite precipitation, air stripping and acid scrubbing: A pilot study. *Chemosphere*, 212, 1030-1037, <https://doi.org/10.1016/j.chemosphere.2018.08.154>
- Metcalf & Eddy, Wastewater engineering, treatment and resource recovery International 5th edition, McGraw Hill, 2014.
- Antonini, S., Paris, S., Eichert, T. and Clemens, J. (2011), Nitrogen and phosphorus recovery from human urine by struvite precipitation and air stripping in Vietnam. *Clean Soil Air Water*, 39: 1099-1104. <https://doi.org/10.1002/clen.201100036>

#### BIOCHAR/HYDROCHAR PRODUCTION

(SU 6)

#### INPUTS

#### Construction

- Muffle or stove for pyrolysis, torrefaction, gasification, or hydrothermal carbonization
- Organic carbon-rich material/C-rich biomass (dry [for biochar production] or wet [for hydrochar production]). Biochar can be produced from different types of biomass residues, including crop plants (e.g., rice husk, wheat bran), and as an intermediate product in bioethanol production (biowastes from the food processing industry). Hydrochar can be produced by wet animal manures, sewage sludge, and algae
- Physical conditions: in dry oxygen starved ambience at 200-900°C for biochar production, in subcritical water (at lower temperatures, 150-350°C) for hydrochar production

#### **Type of incoming streams**

- Appropriate chemical characteristics of biomasses (e.g. C-rich materials)
- Appropriate physical characteristics of biomasses (dry or wet, it depends if you want to produce biochar or hydrochar, respectively)

#### **Operation**

- Biomass collection
- Products and by-products recovery

#### **Maintenance**

- Checking plant system seal (e.g. troubles for high pressures/temperatures)

#### **Connecting NBS units**

- Solid waste anaerobic treatment (26)
- Treatment wetlands (21)
- Street trees/urban parks (39–41)
- Productive garden (49), urban forest (50), urban farms and orchards (51)
- Public green space (37-43)

#### **Connecting NBS supporting units**

- Solid/liquid separation unit (S7)
- Mechanical pre-treatment (shredding and mixing) (ADD)

### **OUTPUTS**

#### **Type of outgoing streams**

- Biochar, hydrochar (material recovery and reuse)
- Ash
- Combustible gases (carbon monoxide [CO], methane [CH<sub>4</sub>], and hydrogen gas [H<sub>2</sub>]) for energy production
- Water
- Condensable tar (by-products; small amounts)
- Carbon sequestration
- Nutrient recovery (because of the production of N-rich products)

#### **Co-benefits and limitations**

- If used as soil physical and chemical improvers, biochar and hydrochar could improve nutrient management, increase soil carbon storage, enhance water infiltration and retention, encourage beneficial soil organisms and prevent soil compaction; it can also be used as peat substitute in peat-free substrates in plant nurseries

#### **Risks**

- Heavy metals sources
- Landfill use (for tar)
- If used in high quantity as soil improvers, biochar and hydrochar could increase albedo

#### Connecting NBS units

- Public green space (NBS 39–41)
- Productive gardens, urban farms and orchards (NBS 49 and 51)
- Soil improvement and conservation (NBS 33)
- Green roofs and walls (NBS 13–20)

#### Connecting NBS supporting units

- Air treatment
- Leachate treatment
- Heat exchanger

#### FURTHER READINGS

- Cao, X.; Ma, L.; Gao, B.; Harris, W. Dairy-manure derived biochar effectively sorbs lead and atrazine. *Environ. Sci. Technol.* **2009**, 43, 3285-3291. <https://doi.org/10.1021/es803092k>
- Di Lonardo, S.; Baronti, S.; Vaccari, F.P.; Albanese, L.; Battista, P.; Miglietta, F.; Bacci L. Biochar-based nursery substrates: the effect of peat substitution on reduced salinity. *Urb. For. Urb. Greening* **2017**, 23, 27-34. <https://doi.org/10.1016/j.ufug.2017.02.007>
- Glaser, B.; Parr, M.; Braun, C.; Kopolo, G. Biochar is carbon negative. *Nature Geoscience* **2009**, 2, 2. <https://doi.org/10.1038/ngeo395>
- Niazi et al. (2016). Removal and Recovery of Metals by Biosorbents and Biochars Derived From Biowastes. In: *Environmental Materials and Waste*. pp.149–177. doi:10.1016/b978-0-12-803837-6.00007-x
- Xue, Y.; Gao, B.; Yao, Y.; Inyang, M.; Zhang, M.; Zimmerman, A.R.; Ro, K.S. Hydrogen peroxide modification enhances the ability of biochar (hydrochar) produced from hydrothermal carbonization of peanut hull to remove aqueous heavy metals: batch and column tests. *Chem. Eng. J.* **2012**, 200-202, 673-680. <https://doi.org/10.1016/j.cej.2012.06.116>
- Yao, Y.; Gao, B.; Inyang, M.; Zimmerman, A.R.; Cao, X.; Pullammanappallil, P.; Yang, L. Biochar derived from anaerobically digested sugar beet tailings: characterization and phosphate removal potential. *Bioresour. Technol.* **2011**, 102, 6273-6278. <https://doi.org/10.1016/j.biortech.2011.03.006>

#### MEMBRANES

(SU 8)

#### INPUTS

##### Construction

- Membranes
- Tank (optional, membranes can be placed outside)
- Pumps to pump water through membrane and create driving force for filtration
- Blower (in case when membranes cleaning can be done through backwashing)
- Pre-treatment (degree of treatment needed depends on the quality of incoming water)

##### Type of incoming streams

- Polluted waters, e.g. treated or untreated wastewater, rainwater, grey water, black water

- Avoid inert material (grid) otherwise pre-treatment might be necessary

#### Operation

- Electricity for water pumping, cleaning, etc.
- Chemicals for cleaning
- Back flush (if membrane can be backwashed)

#### Maintenance

- Periodical cleaning of the membranes to prevent membrane blocking
- Regular maintenance of pre-treatment unit (if needed for membrane operation)

#### Connecting NBS units

- Treatment wetland (NBS 21)
- Algal photobioreactors (NBS 48)
- Anaerobic treatment (NBS 26)
- Aerobic (post) treatment (NBS 27)

#### Connecting NBS supporting units

- Solid/liquid separation (SU 7)
- Membrane filtration (SU 8)

### OUTPUTS

#### Type of outgoing streams

- Effluent water with quality that can be tailored by the type of membrane used and enabling water reuse: “fit for use” depending on end user needs
- Concentrate stream (brine) with accumulated compounds that do not pass through the membrane. Brine streams treatment and/or the possibility to reduce the liquid stream by e.g. crystallization => zero-liquid discharge)

#### Co-benefits and limitations

- Effluent is solid free and of high-quality enabling water reuse
- Effluent is pathogen free in case of UF, NF and RO
- Small footprint
- Relatively High energy use

#### Risks

- Concentrated stream needs to be handled

#### Connecting NBS units

- Street trees (NBS 39)
- Large urban park (NBS 40)
- Pocket/garden park (NBS 41)
- Productive Garden (NBS 49)
- Urban forest (NBS 50)

#### Connecting NBS supporting units

- Disinfection (SU 5)
- Membrane filtration (SU 8)
- Adsorption (SU 9)
- Advanced oxidation (SU 10)

### FURTHER READINGS

- Ezugbe, E. & Rathilal, S. (2020). Membrane Technologies in Wastewater Treatment: A Review. In: *Membranes*. 10. 89. <https://doi.org/10.3390/membranes10050089>
- Case studies on greywater treatment in Ghent, polishing of treated black and grey water before reuse in soap industry and greywater plus treated BW Noorderhoek Sneek (e.g. <https://run4life-project.eu/>, [https://www.sanimonitor.nl/rapportage-projecten/noorderhoek-grijswaterbehandeling---actiefslibsysteem/detail\\_data=493](https://www.sanimonitor.nl/rapportage-projecten/noorderhoek-grijswaterbehandeling---actiefslibsysteem/detail_data=493))
- Baker R.W. (2004) Membrane Technology and Applications, 2<sup>nd</sup> Edition, Wiley & Sons, ISBN:9780470020395 | DOI:10.1002/0470020393
- Krzeminski, P., Katsou, E., Dosoretz, C.G., Esteban-Garcia, A.L., Leverette, L., Malamis, S., Nenov, V., Robles, A., Seco, A., Syron, E. (2017) Membranes in wastewater treatment, in: J.M. Lema, S. Suarez Martinez (Eds.), 'Innovative Wastewater Treatment & Resource Recovery Technologies: Impacts on Energy, Economy and Environment', IWA Publishing, London, UK, 2017, pp. 129-154, ISBN: 9781780407869 [https://doi.org/10.2166/9781780407869\\_0129](https://doi.org/10.2166/9781780407869_0129)
- [https://www.researchgate.net/publication/288156315\\_Experiment\\_with\\_willows\\_to\\_treat\\_RO\\_concentrate\\_at\\_Torreele%27s\\_water\\_re-use\\_facility\\_in\\_Flanders\\_Belgium](https://www.researchgate.net/publication/288156315_Experiment_with_willows_to_treat_RO_concentrate_at_Torreele%27s_water_re-use_facility_in_Flanders_Belgium)
- <https://www.kwrwater.nl/projecten/zero-liquid-discharge-voor-de-glastuinbouw-fase-2/>
- <https://www.desalitech.com/desalitech-wins-zero-liquid-deal-in-china/>

## BIOLOGICALLY ACTIVATED CARBON (BAC) TREATMENT / ACTIVATED CARBON (AC) ADSORPTION (SU 9)

### INPUTS

#### Construction

- Concrete or metallic filter
- Inflow and outflow pipes (and pumps)
- Granular activated carbon

#### Type of incoming streams

- Polluted water

#### Operation

- Filter backwashing

#### Maintenance

- Substitution of exhausted activated carbon

#### Connecting NBS units

- Treatment wetland (NBS 21)
- Waste stabilisation pond (NBS 22)
- Aerobic (post)treatment (NBS 27)

#### Connecting NBS supporting units

- Rainwater harvesting (SU 1)
- Phosphate precipitation (SU 3)
- Ammonia stripping (SU 4)
- Disinfection (SU 5)
- Solid/liquid separation (SU 7)
- Membrane filtration (SU 8)

## OUTPUTS

### Type of outgoing streams

- Activated carbon (material recovery and reuse; a material with adsorption capacity, active free valences, high surface area, porous structure, surface reactivity, inertness, and thermal stability that provides a large surface area to which may adsorb so it is used as filter matrix)
- Effluent

### Co-benefits and limitations

- C-rich material reuse
- Carbon sequestration

### Risks

- -

### Connecting NBS units

- Street trees (NBS 39)
- Large urban park (NBS 40)
- Pocket/garden park (NBS 41)

### Connecting NBS supporting units

- Disinfection (SU 5)

## FURTHER READINGS

- Pharmafilter (includes ozone) <https://pharmafilter.nl/en/>
- VUNA-system for Aurin production <https://vuna.ch/en/>
- ben Mosbah, M., Mechi, L., Khiari, R., & Moussaoui, Y. (2020). Current State of Porous Carbon for Wastewater Treatment. *Processes*, 8(12), 1651. <https://doi.org/10.3390/pr8121651>
- Hassan, M. M., & Carr, C. M. (2020). Biomass-derived porous carbonaceous materials and their composites as adsorbents for cationic and anionic dyes: A review. *Chemosphere*, 129087. <https://doi.org/10.1016/j.chemosphere.2020.129087>
- Ponnuchamy, M., Kapoor, A., Senthil Kumar, P. et al. Sustainable adsorbents for the removal of pesticides from water: a review. *Environ Chem Lett* **19**, 2425–2463 (2021). <https://doi.org/10.1007/s10311-021-01183-1>
- Thuptimrang, P., Siripattanakul-Ratpukdi, S., Ratpukdi, T., Youngwilai, A., & Khan, E. (2021). Biofiltration for treatment of recent emerging contaminants in water: Current and future perspectives. *Water Environment Research*, 93(7), 972-992. <https://doi.org/10.1002/wer.1493>
- Korotta-Gamage, S. M., & Sathasivan, A. (2017). A review: Potential and challenges of biologically activated carbon to remove natural organic matter in drinking water purification process. *Chemosphere*, 167, 120-138. <https://doi.org/10.1016/j.chemosphere.2016.09.097>

## ADVANCED OXIDATION PROCESSES (AOPs)

(SU 10)

### INPUTS

#### Construction

- Tanks (reactors for the AOP processes)

- Pumps
- Generator of ozone and hydrogen-peroxide

#### Type of incoming streams

- Treated grey water
- Influent with low organic matter content

#### Operation

- Chemicals (FeSO<sub>4</sub>, H<sub>2</sub>O<sub>2</sub>, etc)
- UV source
- Catalyst
- TiO<sub>2</sub>
- Mixing

#### Maintenance

- Monitoring of COD, pH, temperature
- Replacing UV lamps

#### Connecting NBS units

- -

#### Connecting NBS supporting units

- Solid/liquid separation (SU 7)
- Membrane filtration (SU 8)
- Biologically activated carbon (BAC) treatment / activated carbon (AC) adsorption (SU 9)

### OUTPUTS

#### Type of outgoing streams

- Check presence of undesired byproducts
- Material waste – exhausted catalysts (if we choose to use photocatalysis)

#### Co-benefits and limitations

- Removal of pathogens
- Highly treated wastewater (high quality effluent)
- Removal of xenobiotics
- Removal of non-biodegradable and highly toxic compounds

#### Risks

- Unwanted by-products (insufficient treatment of some non-biodegradable organic materials)

#### Connecting NBS units

- -

#### Connecting NBS supporting units

Biologically activated carbon (BAC) treatment / activated carbon (AC) adsorption (SU 9)

### FURTHER READINGS

- Bermúdez, L. A., Pascual, J. M., Martínez, M. D. M. M., & Capilla, J. M. P. (2021). Effectiveness of Advanced Oxidation Processes in Wastewater Treatment: State of the Art. *Water*, 13(15), 2094. <https://doi.org/10.3390/w13152094>
- Rizzo, L., Gernjak, W., Krzeminski, P., Malato, S., McArdell, C. S., Perez, J. A. S., ... & Fatta-Kassinos, D. (2020). Best available technologies and treatment trains to address current challenges in urban wastewater reuse for irrigation of crops in EU countries. *Science of the Total Environment*, 710, 136312. <https://doi.org/10.1016/j.scitotenv.2019.136312>

- Miklos, D. B., Remy, C., Jekel, M., Linden, K. G., Drewes, J. E., & Hübner, U. (2018). Evaluation of advanced oxidation processes for water and wastewater treatment–A critical review. *Water Research*, 139, 118-131. <https://doi.org/10.1016/j.watres.2018.03.042>
- Rizzo, L., Malato, S., Antakyali, D., Beretsou, V. G., Đolić, M. B., Gernjak, W., ... & Fatta-Kassinos, D. (2019). Consolidated vs new advanced treatment methods for the removal of contaminants of emerging concern from urban wastewater. *Science of the Total Environment*, 655, 986-1008. <https://doi.org/10.1016/j.scitotenv.2018.11.265>
- Rodríguez-Chueca, J., Ormad, M. P., Mosteo, R., Sarasa, J., & Ovelleiro, J. L. (2015). Conventional and advanced oxidation processes used in disinfection of treated urban wastewater. *Water Environment Research*, 87(3), 281-288. <https://doi.org/10.2175/106143014X13987223590362>
